# Supplementary material for: Hygiene of Medical Devices and Minimum Inhibitory Concentrations for Alcohol-Based and QAC Disinfectants among Isolates from Physical Therapy Departments
Source: MDPI journal article supplement (doi:10.3390/ijerph192214690), 2022-11-09
Supplement: s1 [file s1]

**Supplementary Material File S1.** Concentration of microorganisms (cfu/mL) on reusable devices.

|                           | Before use (B) | After use (U) | After disinfection (D) |
|---------------------------|----------------|---------------|------------------------|
|                           | [cfu/cm²]      |               |                        |
| INSTITUTION A             |                |               |                        |
| Physiotherapy             |                |               |                        |
| therapeutic pillow P1     | 0,9            | 15,6          | 0                      |
| stationary bike P2        | 1              | 0             | 0,4                    |
| therapeutic bars P3       | 15             | 15            | 15                     |
| stilts P4                 | 1,4            | 0,3           | 15                     |
| stimulation electrodes P5 | 1,1            | 0,9           | 0                      |
| Occupational therapy      |                |               |                        |
| wooden accessorise 1 O1   | 30             | 0,2           | 0                      |
| wooden accessorise 2 O2   | 15             | 3             | 0,5                    |
| hand bike O3              | 15             | 3,2           | 15                     |
| therapeutic ball O4       | 0,9            | 0,6           | 0,1                    |
| work desk O5              | 0,1            | 1,5           | 1,3                    |
| Common area               |                |               |                        |
| key board C1              | /              | 0,1           | 0,5                    |
| coffe machine C2          | /              | 0,1           | 0,2                    |
| INSTITUTION B             |                |               |                        |
| Physiotherapy             |                |               |                        |
| therapeutic pillow P1     | 0              | 0             | 0                      |
| stationary bike P2        | 30             | 30            | 30                     |
| therapeutic bars P3       | 2,1            | 30            | 30                     |
| stilts P4                 | 15             | 30            | 30                     |
| stimulation electrodes P5 | 0              | 30            | 30                     |
| Occupational therapy      |                |               |                        |
| jigsaw puzzle O1          | 0              | 0             | 0                      |
| wooden accessorise O2     | 0              | 0,1           | 0                      |
| wooden ladder O3          | 0,2            | 30            | 0                      |
| work desk O4              | 0              | 12            | 30                     |
| Common area               |                |               |                        |
| keyboard C1               | /              | 30            | 30                     |
| coffee machine C2         | /              | /             | 30                     |
| INSTITUTION C             |                |               |                        |
| Physiotherapy             |                |               |                        |
| therapeutic pillow P1     | 2              | /             | /                      |
| seat cushion P2           | /              | 4,8           | 0,4                    |
| stimulation electrodes P3 | 30             | /             | /                      |
| OCCUPATIONAL THERAPY      |                |               |                        |
| plastic accessorise O1    | /              | 30            | 0,4                    |
| LED monitor O2            | /              | 0             | 0,3                    |
| hand bike O3              | 30             | 1,6           | 0                      |
| therapeutic ball O4       | 0,3            | /             | 0,1                    |
| work desk O5              | 30             | /             | /                      |
| INSTITUTION D             |                |               |                        |

|                             |     |    |     |
|-----------------------------|-----|----|-----|
| <i>Physiotherapy</i>        |     |    |     |
| therapeutic pillow P1       | 30  | 30 | 0,1 |
| stationary bike P2          | 0,1 | 30 | 0   |
| therapeutic bars P3         | 0   | 0  | 0,1 |
| Stilts P4                   | 0,2 | 30 | 30  |
| stimulation electrodes P5   | 0,2 | 30 | /   |
| <i>Occupational therapy</i> |     |    |     |
| plastic accessorise O1      | 0,1 | 30 | 0,3 |
| wooden accessorise O2       | 30  | 30 | 0   |
| hand bike O3                | 30  | 30 | 0,1 |
| therapeutic ball O4         | 30  | 30 | 30  |
| work desk O5                | 0,5 | 30 | 30  |
| <i>Common area</i>          |     |    |     |
| Keyboard C1                 | /   | 17 | 0,1 |
| coffee machine C2           | /   | 20 | 25  |

Legend: P- physiotherapy; O – occupational therapy; C – common area; the number represents the sampled device.
